# Supplementary material for: Multiplexed aptasensor for detection of acute myocardial infraction (AMI) biomarkers
Source: Royal Society of Chemistry journal article supplement (doi:10.1039/d4sd00010b), 2024-01-01
Supplement: d4sd00010b1.pdf [file d4sd00010b1.pdf]

# Supporting Information TO Multiplexed Aptasensor for Detection of Acute Myocardial Infraction (AMI) Biomarkers

Duygu Beduk †<sup>a</sup>, Tutku Beduk †<sup>b,c</sup>, Abdellatif Ait Lahcen<sup>d</sup>, Veerappan Mani<sup>e</sup>, Emine Guler Celik<sup>e</sup>, Gamze Iskenderoglu<sup>f</sup>, Ferhat Demirci<sup>g</sup>, Soysal Turhan<sup>h</sup>, Oner Ozdogan<sup>h</sup>, Su Ozgur<sup>i</sup>, Tuncay Goksel<sup>j,k</sup>, Kutsal Turhan<sup>k</sup>, Khaled Nabil Salama<sup>\*c</sup>, Suna Timur<sup>\*a,l</sup>

<sup>a</sup>Central Research Test and Analysis Laboratory Application and Research Center, Ege University, 35100 Bornova, Izmir, Turkey

<sup>b</sup>Silicon Austria Labs (SAL) GmbH, Europastraße 12, 9500, Villach, Austria

<sup>c</sup>Sensors Lab, Advanced Membranes and Porous Materials Center, Computer, Electrical, and Mathematical Science and Engineering Division, King Abdullah University of Science and Technology (KAUST), Thuwal 23955-6900 Saudi Arabia

<sup>d</sup>Weill Cornell Medicine, Cornell University, New York, NY 10021, USA

<sup>e</sup>Department of Bioengineering, Faculty of Engineering, Ege University, 35100, Bornova, Izmir, Turkey

<sup>f</sup>Department of Cardiovascular Surgery, Health Sciences University Izmir Tepecik Education And Research Hospital, 35180, Konak, Izmir, Turkey

<sup>g</sup>Department of Medical Biochemistry, Health Sciences University Izmir Tepecik Education And Research Hospital, 35180, Konak, Izmir, Turkey

<sup>h</sup>Department of Cardiology, Health Sciences University Izmir Tepecik Education And Research Hospital, 35180, Konak, Izmir, Turkey

<sup>i</sup>EGESAM-Ege University Translational Pulmonary Research Center, 35100, Bornova, Izmir, Turkey

<sup>j</sup>Department of Pulmonary Medicine, Faculty of Medicine, Ege University, 35100, Bornova, Izmir, Turkey

<sup>k</sup>Department of Thoracic Surgery, Ege University School of Medicine, 35100, Bornova, Izmir, Turkey

<sup>l</sup>Department of Biochemistry, Faculty of Science, Ege University, 35100 Bornova, Izmir, Turkey, [suna.timur@ege.edu.tr](mailto:suna.timur@ege.edu.tr)

† Duygu Beduk and Tutku Beduk contributed equally to this manuscript.

## 1. Laser-Scribed Graphene Electrode Fabrication

The fabrication procedure was followed as previously explained.<sup>1</sup> The predesigned LSG three-electrode system was prepared on a commercially available substrate PI sheet (Kapton Width: 12", Utech Products, USA). A CO<sub>2</sub> laser (Universal Laser Systems® PLS6.75) with a wavelength of 10.6 μm and a spot size of ~150 μm was used to irradiate a PI sheet to produce graphene electrodes as the photothermal process leads to molecular rearrangements. A polymer precursor was cleaned before the scribing process for the fabrication of three three-electrode sensing systems (2.8 cm × 1.2 cm). To achieve the best graphene quality formation, the laser scribing speed and power were optimized to fabricate the LSG electrodes while using an inert gas flow to minimize the heteroatom bonding effect. Laser power, speed, and z distance were recorded as 3.2 W, 2.8 cm/s, and 2.5 mm, respectively, at 1000 pulses per inch to produce the best-quality multilayer graphene with high conductivity.

## 2. Electrochemical Measurements

The electrochemical responses of AuLSG aptamer electrodes were investigated using the cyclic voltammetry (CV) method. The CV method employed a scan rate of 50 mV/s, sweeping the potential from -0.6 V to +0.4 V. Measurements were carried out at room temperature in a solution of 0.1 M KCl containing 2.5 mM [Fe(CN)<sub>6</sub>]<sup>3-</sup>/[Fe(CN)<sub>6</sub>]<sup>4-</sup> as a redox probe, with LSG serving as the reference and counter electrodes. The purpose was to examine the electrochemical changes in response to the interaction of the aptamer-modified electrodes with cTnT, cTnI, and CRP proteins. The variations in current intensities were indicative of the different amounts of target analytes captured by the DNA aptamer immobilized on the electrode surface. Notably, all electrochemical measurements were conducted in triplicate to ensure the reliability and reproducibility of the results.

### 3. Characterizations

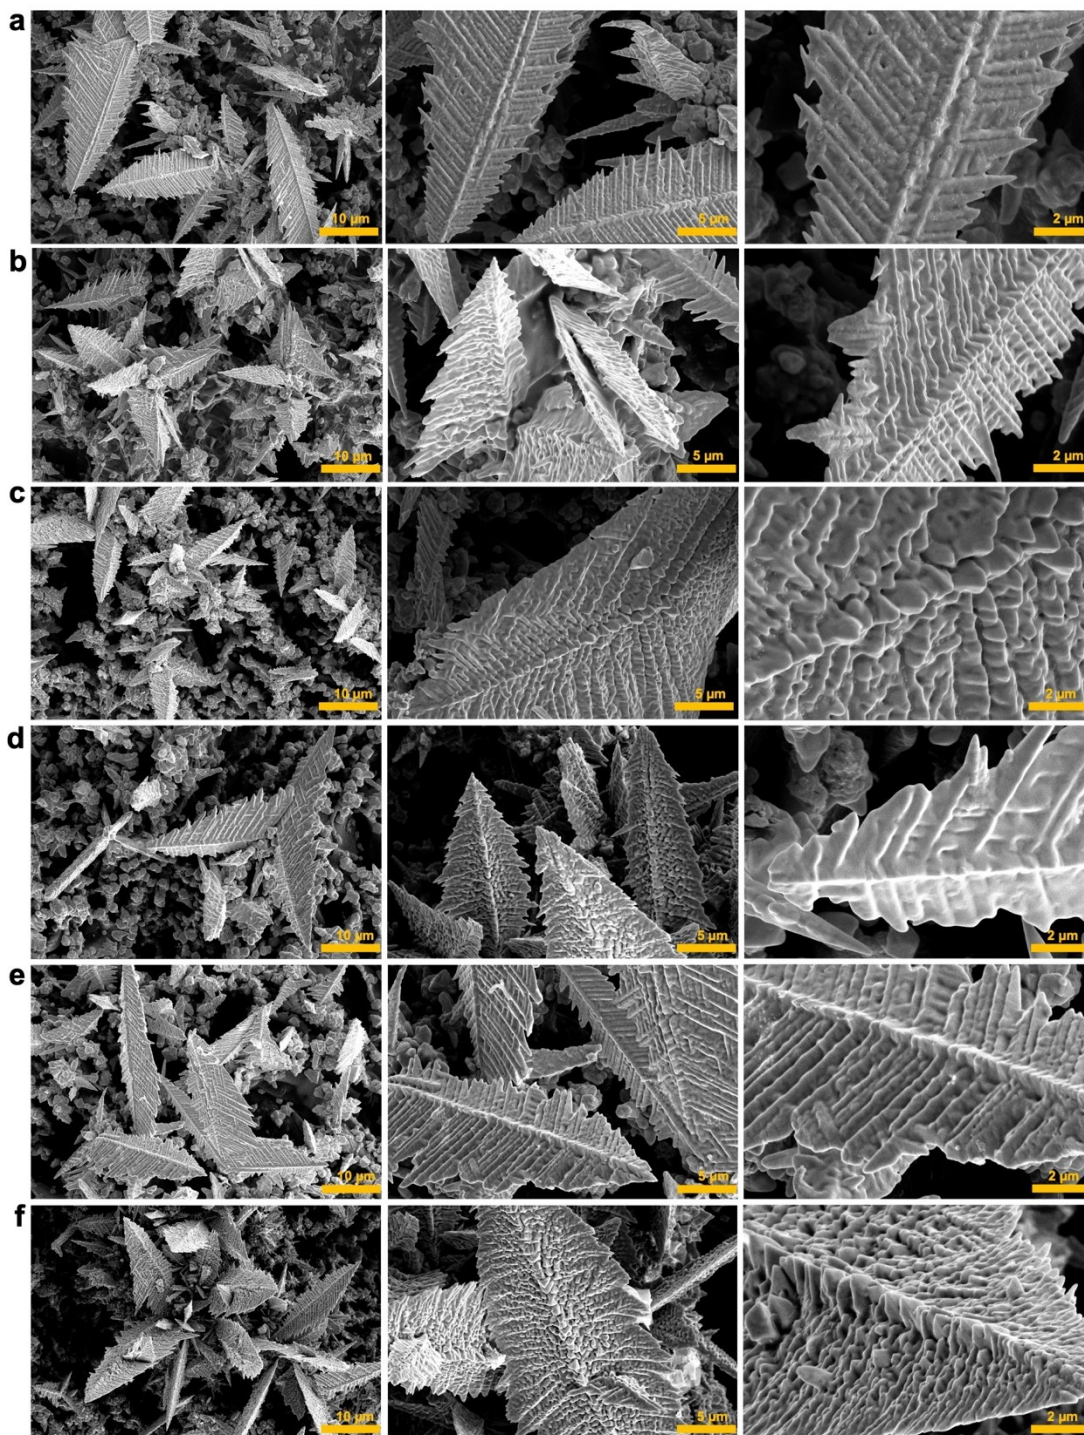

**Figure S1.** Scanning Electron Microscopy (SEM) images of (a) AuLSG/cTnI Aptamer/MCH Sensor, (b) AuLSG/cTnT Aptamer/MCH Sensor, (c) AuLSG/CRP Aptamer/MCH Sensor, (d) AuLSG/cTnI Aptamer/MCH/BSA Sensor, (e) AuLSG/cTnT Aptamer/MCH/BSA Sensor, (f) AuLSG/CRP Aptamer/MCH/BSA Sensor.

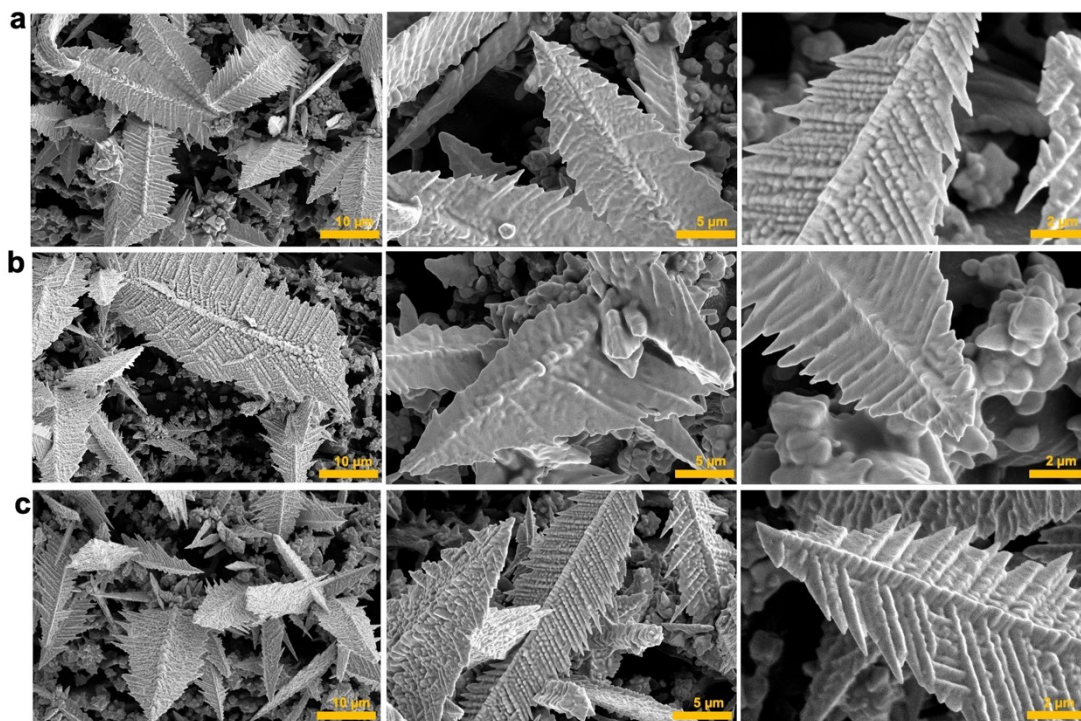

**Figure S2.** Scanning Electron Microscopy (SEM) images of (a) AuLSG/cTnI Aptamer/MCH/BSA Sensor/Serum Sample (b) AuLSG/cTnT Aptamer/MCH/BSA Sensor/Serum Sample (c) AuLSG/CRP Aptamer/MCH/BSA Sensor/Serum Sample in different magnifications.

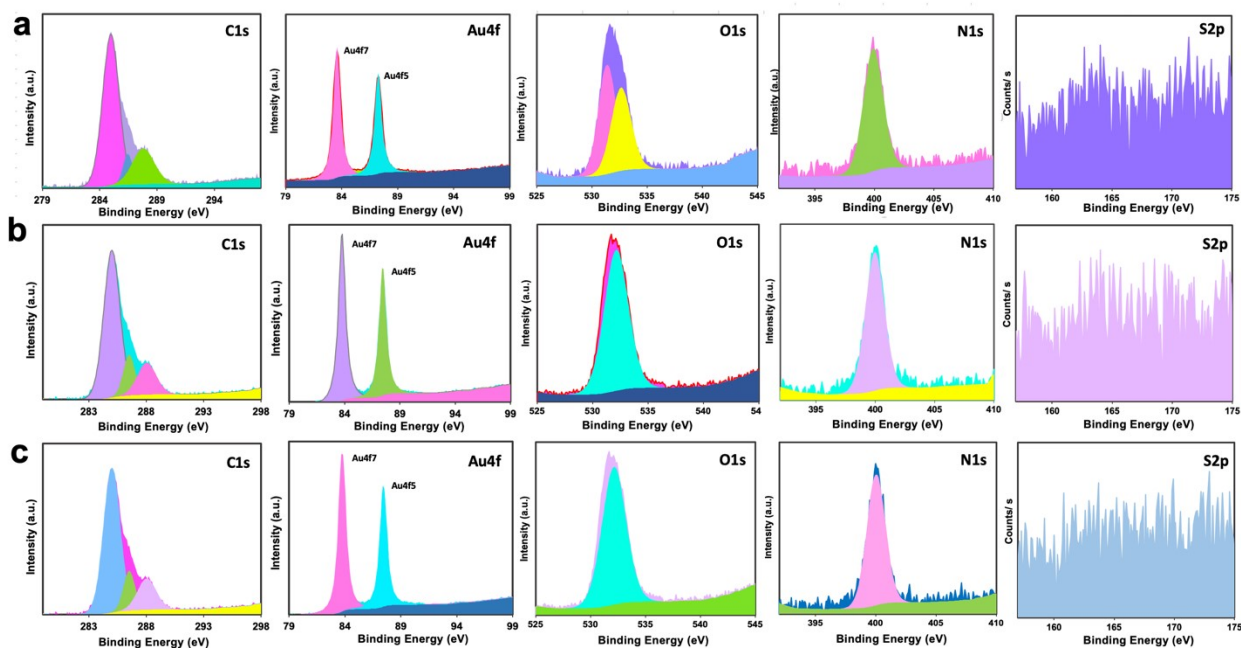

**Figure S3.** XPS High-resolution spectra of (a) AuLSG/cTnI aptamer/BSA/cTnI protein, (b) AuLSG/cTnT aptamer/BSA/cTnT protein, (c) AuLSG/CRP aptamer/BSA/CRP protein

**Table S1.** Elemental composition of the sensor surface at each fabrication step.

| Elements    | Atomic % |       |                           |                           |                          |
|-------------|----------|-------|---------------------------|---------------------------|--------------------------|
|             | LSG      | AuLSG | AuLSG/cTnI<br>Aptamer/MCH | AuLSG/cTnT<br>Aptamer/MCH | AuLSG/CRP<br>Aptamer/MCH |
| <b>Au4f</b> | -        | 22.05 | 5.4                       | 3.41                      | 2.62                     |
| <b>C1s</b>  | 77.71    | 64.32 | 52.18                     | 50.43                     | 49.39                    |
| <b>N1s</b>  | 3.51     | -     | 8.17                      | 9.84                      | 8.74                     |
| <b>O1s</b>  | 17.53    | 11    | 21.15                     | 20.76                     | 19.38                    |
| <b>S2p</b>  | -        | 2.64  | -                         | -                         | -                        |

**Table S2.** Elemental composition of the sensor surface at each fabrication step.

| Elements    | Atomic %                      |                               |                              |                                                   |                                                   |                                                 |
|-------------|-------------------------------|-------------------------------|------------------------------|---------------------------------------------------|---------------------------------------------------|-------------------------------------------------|
|             | AuLSG/cTnI<br>Aptamer/MCH/BSA | AuLSG/cTnT<br>Aptamer/MCH/BSA | AuLSG/CRP<br>Aptamer/MCH/BSA | AuLSG/cTnI<br>Aptamer/MCH/<br>BSA/cTnI<br>Protein | AuLSG/cTnT<br>Aptamer/MCH/<br>BSA/cTnT<br>Protein | AuLSG/CRP<br>Aptamer/MCH/<br>BSA/CRP<br>Protein |
| <b>Au4f</b> | 9.06                          | 8.1                           | 9.61                         | 3.44                                              | 1.98                                              | 3.48                                            |
| <b>C1s</b>  | 50.47                         | 54.41                         | 53.62                        | 64.61                                             | 66.84                                             | 65.74                                           |
| <b>N1s</b>  | 6.64                          | 7.75                          | 9.15                         | 10.21                                             | 9.84                                              | 10.05                                           |
| <b>O1s</b>  | 18.85                         | 17.02                         | 18.25                        | 16.37                                             | 17.46                                             | 17.46                                           |

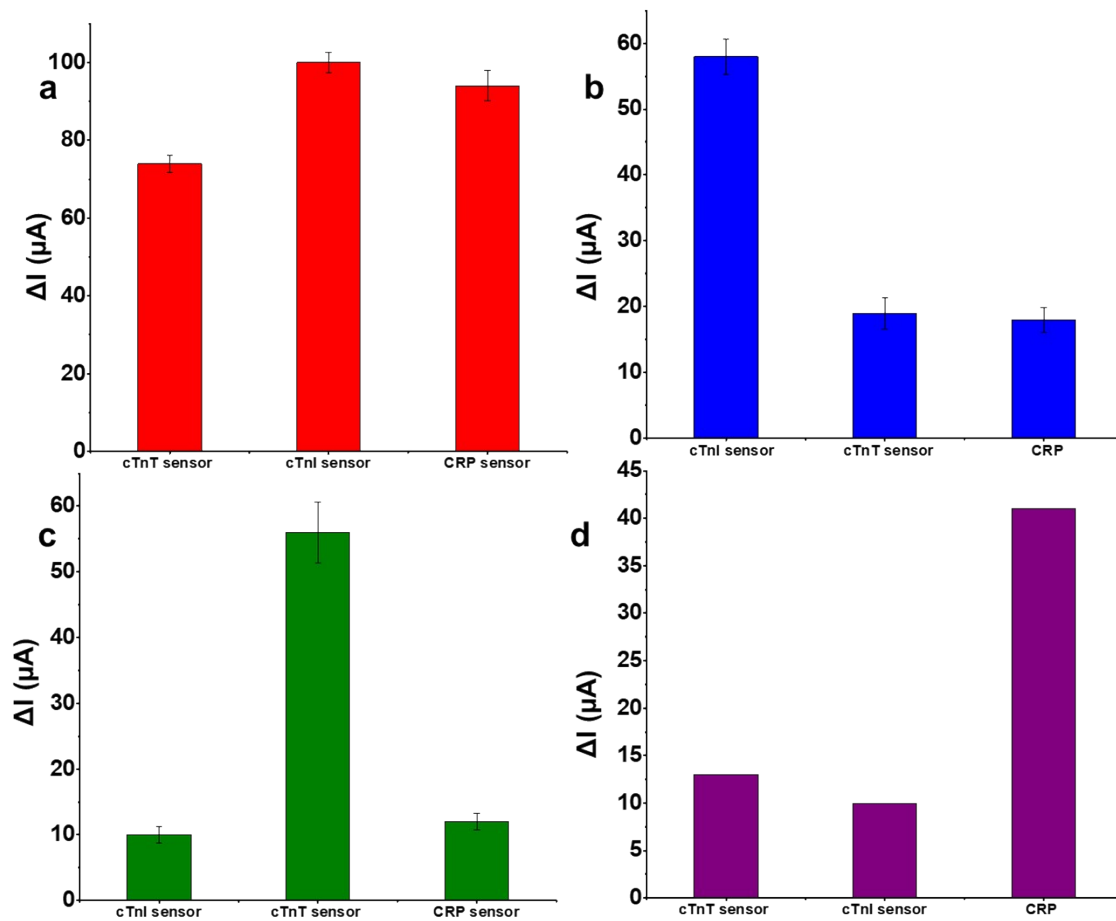

**Figure S4.** a. Oxidation current change of aptasensors when a patient serum is introduced. The oxidation current change of cTnT, cTnI, CRP aptasensors when b, 0.5 ng/ml of cTnI protein, c, 50 ng/ml of cTnT protein, d, 50 ng/ml of CRP introduced as analyte.

**Table S3.** Summary of reported electrochemical platforms for cardiac biomarkers.

| <b>Cardiac Biomarker</b>                    | <b>Detection Platform</b>                    | <b>Electrode Type</b>                    | <b>Media</b>               | <b>LOD</b>                                                      | <b>Ref.</b> |
|---------------------------------------------|----------------------------------------------|------------------------------------------|----------------------------|-----------------------------------------------------------------|-------------|
| <b>Troponin I</b>                           | Electrochemiluminescence Immunosensor        | Bipolar Electrode                        | Human Serum Samples        | 0.4416 pg/mL                                                    | 2           |
| <b>Troponin I</b>                           | Sandwich-Type Aptasensor                     | Au/Zr-C/SPCE                             | Standard Solutions         | $1.24 \times 10^{-3}$ pg/mL                                     | 3           |
| <b>Troponin I</b>                           | Aptasensor                                   | LSG/ZnFe <sub>2</sub> O <sub>4</sub>     | Spiked human serum samples | 1.0 pg/mL                                                       | 4           |
| <b>Troponin I</b>                           | Labeled Free Immunosensor                    | CMK-3/AuNPs-Modified Gold Electrode      | Human Serum Samples        | 2.4 fg/mL                                                       | 5           |
| <b>Troponin I, Myoglobin</b>                | Sandwich-Type Aptasensor                     | CAu/CC/SPCE                              | Standard Solutions         | cTnI:<br>3.8 fg/mL<br>Myo:<br>35 fg/mL                          | 6           |
| <b>Troponin I</b>                           | Sandwich-Type Aptasensor                     | HMCS/PDA/AuNPs                           | Human Serum Samples        | 2.3 fg/mL                                                       | 7           |
| <b>Troponin I</b>                           | DNAzyme-Driven Aptasensor                    | Au/NiCO <sub>2</sub> S <sub>4</sub> /GCE | Human Serum Samples        | 0.26 pg/mL                                                      | 8           |
| <b>Troponin I</b>                           | Sandwich-Type Immunosensor                   | PtPdCu/BNC/GCE                           | Serum Samples              | 4.27 fg/mL                                                      | 9           |
| <b>Creatine Kinase</b>                      | Immunosensor                                 | GP/AuNP Electrode                        | Blood Samples              | 0.045 pg/mL                                                     | 10          |
| <b>Troponin T</b>                           | Immunosensor                                 | O-Aminobenzoic Acid Film/GCE             | Human Serum Samples        | 0.016 ng/mL                                                     | 11          |
| <b>Troponin T, Troponin I and Myoglobin</b> | Electrogenerated Chemiluminescence Biosensor | Gold Electrode                           | Human Serum Samples        | Myo:<br>0.30 ng/mL,<br>cTnI:<br>0.79 pg/mL<br>cTnT:<br>31 pg/mL | 12          |
| <b>BNP-32, Troponin I</b>                   | Aptasensor                                   | Gold-Based Screen-Printed Electrode      | Spiked Human Serum Samples | BNP-32:<br>1 pg/mL<br>cTnI:<br>1 pg/mL                          | 13          |
| <b>Troponin I</b>                           | Immunosensor                                 | Gold Electrode                           | Human Serum Samples        | 1.7 pg/mL                                                       | 14          |
| <b>Creatine Kinase-MB</b>                   | Label-Free Immunosensor                      | AuPdCu NWNs/GCE                          | Human Serum Samples        | 0.88 pg/mL                                                      | 15          |

|                                                   |                                 |                                |                     |                                                                  |           |
|---------------------------------------------------|---------------------------------|--------------------------------|---------------------|------------------------------------------------------------------|-----------|
| <b>TNF-A and NT-proBNP</b>                        | Surface Plasmon Resonance (SPR) | Single Planar Gold Chip        | Human Serum Samples | NT-proBNP:<br>0.06 pM,<br>TNF-A:<br>0.03 nM                      | 16        |
| <b>Troponin I</b>                                 | Immunosensor                    | GQD/ITO Electrode              | Standard Solutions  | 29 pM                                                            | 17        |
| <b>Troponin T</b>                                 | Immunosensor                    | QTF Electrode                  | Human Serum Samples | 0.24 fg/mL                                                       | 18        |
| <b>Troponin I</b>                                 | CRISPR/Cas12a-Based Biosensor   | Gold Electrode                 | Standard Solutions  | 10 pg/mL                                                         | 19        |
| <b>Troponin T</b>                                 | Label-Free Immunosensor         | ITO/PET Electrode              | Standard Solutions  | 0.571 fg/mL                                                      | 20        |
| <b>C-Reactive Protein</b>                         | Label-Free Biosensor            | AuNPs/BP/PDA Gold Electrode    | Human Blood Samples | 0.7 ng/mL                                                        | 21        |
| <b>C-Reactive Protein</b>                         | Sandwich-Like Immunosensor      | Au-N-CNSs/GCE                  | Human Serum Samples | 7.70 pg/mL                                                       | 22        |
| <b>C-Reactive Protein</b>                         | Immunosensor                    | AuNPs/IL-MoS <sub>2</sub> /GCE | Human Serum Samples | 3.3 pg/mL                                                        | 23        |
| <b>C-Reactive Protein</b>                         | Immunosensor                    | AuNPs/SPCE                     | Human Serum Samples | 0.058 µg/mL                                                      | 24        |
| <b>Troponin T, Troponin I, C-Reactive Protein</b> | Aptasensor                      | AuLSG Electrode                | Human Serum Samples | cTnT:<br>1.65 ng/mL<br>cTnI:<br>2.58 ng/mL<br>CRP:<br>1.84 ng/mL | This work |

#### Abbreviations:

ECL: Electrochemiluminescence, SPCE: Screen Printed Carbon Electrode, Au/Zr-C: Zirconium-Carbon loaded Gold, CMK-3/AuNPs: Nitrogen-Doped Ordered Mesoporous Carbon AuNPs Nanocomposites, GP/AuNP: Gold-Graphite Paper, AuPdCu NWns: Gold palladium copper Alloyed Nanowire Networks, CAu: Coraloid Au, CC: Zirconium-Based Carbon Architecture, HMCS/PDA/AuNPs Polydopamine Modified Hollow Mesoporous Carbon Spheres, GQDs: Graphene Quantum Dots, ITO: Indium Tin Oxide, GCE: Glassy Carbon Electrode, PtPdCu/BNC: Trimetallic PtPdCu Mulberry-Like Nanospheres, ITO/PET: Indium Tin Oxide Coated Polyethylene Terephthalate, Au-N-CNSs: Mono-Dispersed Nitrogen-Rich Porous Carbon Nanospheres Decorated with Au Nanoparticles, QTF: Quartz Tuning Forks, TNF-A: Tumor necrosis factor (TNF)-alpha, NT-pro-BNP: B-type natriuretic peptide.

## References



1. T. Beduk, A. A. Lahcen, N. Tashkandi and K. N. Salama, *Sensors and Actuators B: Chemical*, 2020, **314**, 128026.
2. T. Zhan, Y. Su, W. Lai, Z. Chen and C. Zhang, *Biosensors and Bioelectronics*, 2022, **214**, 114494.
3. K. Chen, H. Zhao, Z. Wang, F. Zhou, Z. Shi, S. Cao and M. Lan, *Biosensors and Bioelectronics*, 2022, **212**, 114431.
4. S. Rauf, V. Mani, A. A. Lahcen, S. Yuvaraja, T. Beduk and K. N. Salama, *Electrochimica Acta*, 2021, **386**, 138489.
5. D. Chen, Y. Gong and Y. Jin, *Int. J. Electrochem. Sci*, 2022, **17**, 2.
6. K. Chen, H. Zhao, Z. Wang, F. Zhou and M. Lan, *Sensors and Actuators B: Chemical*, 2023, 134044.
7. Z. Wang, H. Zhao, K. Chen, S. Cao and M. Lan, *Sensors and Actuators B: Chemical*, 2023, **393**, 134275.
8. J. Huang, T. Zhu, J. Ruan, X. Xu, X. Su, Y. Ma, R. Yang, N. Li and H. Su, *Microchemical Journal*, 2023, **191**, 108756.
9. X. Zhang, Q. Shang, F. Jiang, H. Dong, Y. Li, S. Wang, F. Tang, Q. Liu, Y. Li and Q. Wei, *Bioelectrochemistry*, 2023, **154**, 108512.
10. B. Demirbakan and M. K. Sezginürk, *Journal of Electroanalytical Chemistry*, 2022, **921**, 116656.
11. A. B. Mattos, T. A. Freitas, L. T. Kubota and R. F. Dutra, *Biochemical engineering journal*, 2013, **71**, 97-104.
12. X. Yang, Y. Zhao, L. Sun, H. Qi, Q. Gao and C. Zhang, *Sensors and Actuators B: Chemical*, 2018, **257**, 60-67.
13. I. Grabowska, N. Sharma, A. Vasilescu, M. Iancu, G. Badea, R. Boukherroub, S. Ogale and S. Szunerits, *ACS omega*, 2018, **3**, 12010-12018.
14. S. Feng, M. Yan, Y. Xue, J. Huang and X. Yang, *Analytical Chemistry*, 2021, **93**, 13572-13579.
15. S.-Y. Cen, Y.-G. Feng, J.-H. Zhu, X.-Y. Wang, A.-J. Wang, X. Luo and J.-J. Feng, *Sensors and Actuators B: Chemical*, 2021, **333**, 129573.
16. S. H. Lee, J. H. Back, H. J. Joo, D.-S. Lim, J. E. Lee and H. J. Lee, *Talanta*, 2024, **267**, 125232.
17. S. K. Arumugasamy, G. Chellasamy, K. Yun and J. Hyun, *Journal of Industrial and Engineering Chemistry*, 2024, **129**, 488-498.
18. F. Ari, B. İnce, M. A. Ünal, M. K. Sezginürk and S. A. Ozkan, *Microchemical Journal*, 2023, **195**, 109484.
19. H. Chen, Z.-y. Li, J. Chen, H. Yu, W. Zhou, F. Shen, Q. Chen and L. Wu, *Bioelectrochemistry*, 2022, **146**, 108167.
20. P. Supraja, V. Sudarshan, S. Tripathy, A. Agrawal and S. G. Singh, *Analytical Methods*, 2019, **11**, 744-751.
21. H. J. Yang, M. W. Kim, C. V. Raju, C. H. Cho, T. J. Park and J. P. Park, *Biosensors and Bioelectronics*, 2023, **234**, 115382.
22. Y.-G. Feng, J.-W. He, L.-Y. Jiang, D.-N. Chen, A.-J. Wang and J.-J. Feng, *Sensors and Actuators B: Chemical*, 2022, **358**, 131518.
23. Y. Ma, J. Yang, T. Yang, Y. Deng, M. Gu, M. Wang, R. Hu and Y. Yang, *RSC advances*, 2020, **10**, 9723-9729.
24. P. Guillem, R.-H. Bustos, V. Garzon, A. Munoz and G. Juez, *Sensing and Bio-Sensing Research*, 2021, **31**, 100402.
